# Supplementary material
Source: publisher site journal article supplement (https://www.spandidos-publications.com/1278/downloadSupplementary)

Figure S1. Disease enrichment analysis of the comparison between the leukocytopenia group and the leukocytosis group.

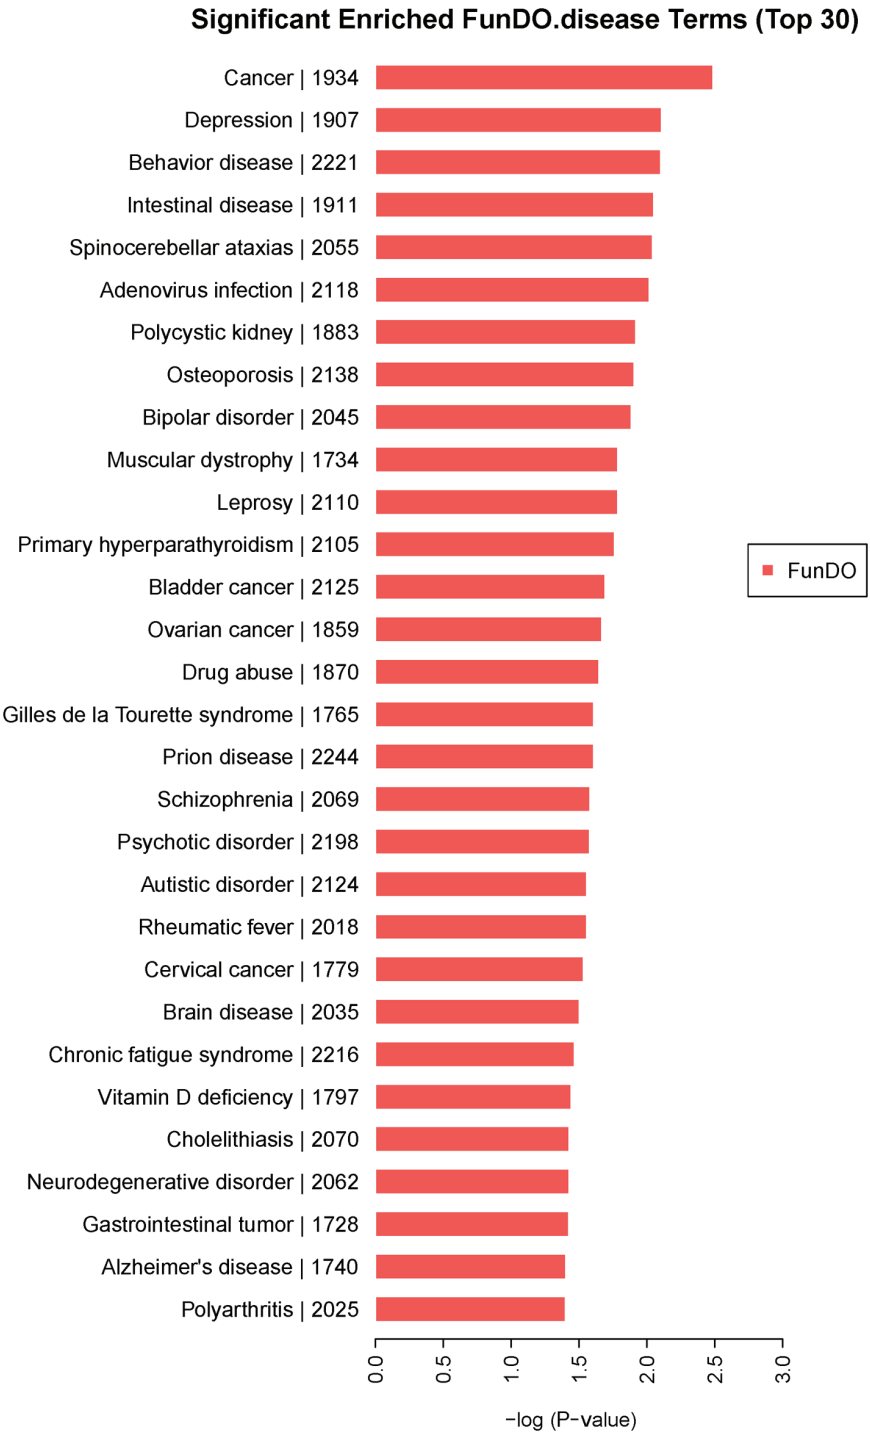

Figure S2. Disease enrichment analysis of the comparison between the leukocytopenia group and the normal control group.

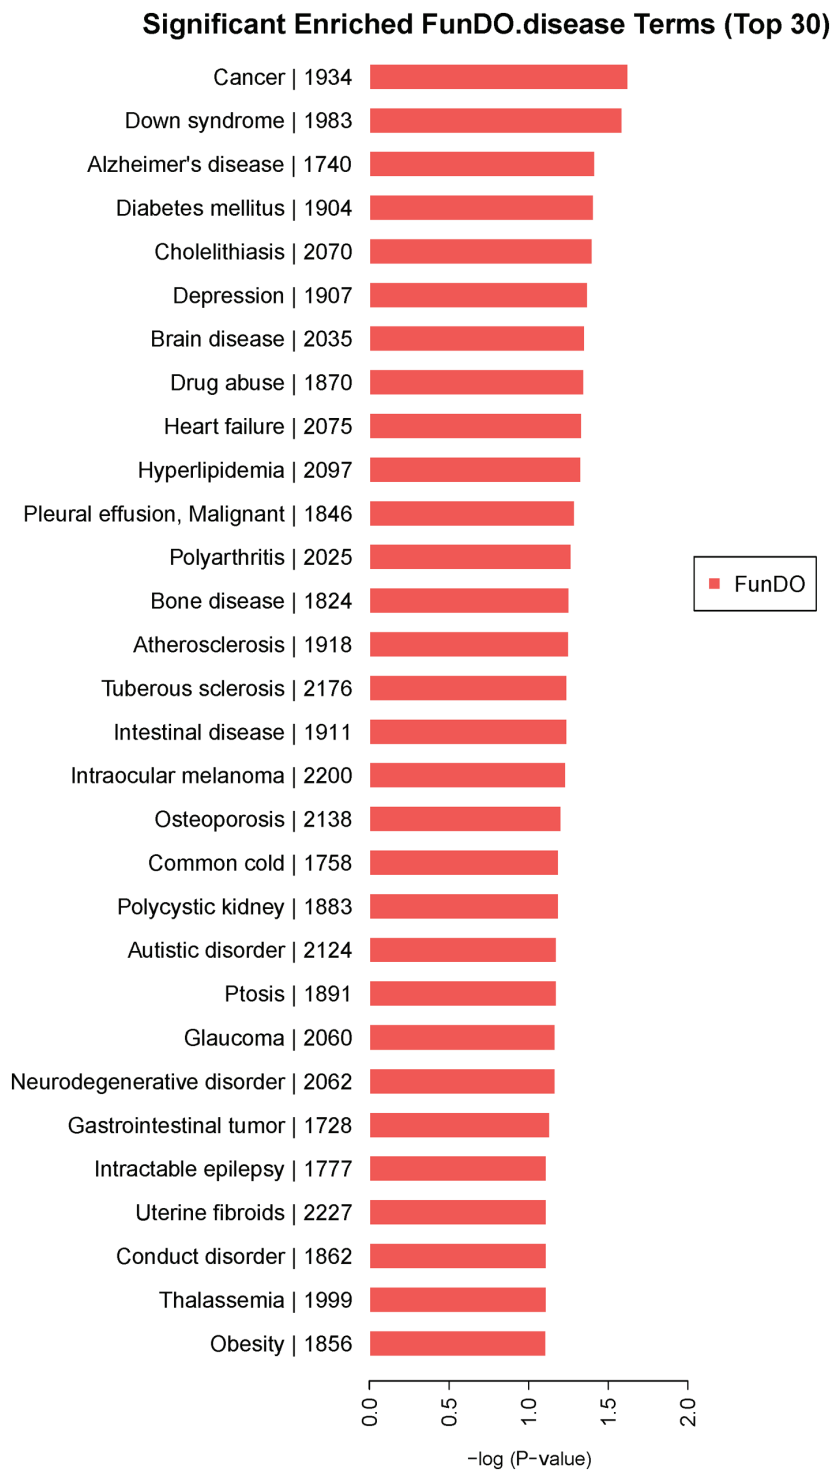

Figure S3. Disease enrichment analysis of the comparison between the leukocytosis group and the normal control group.

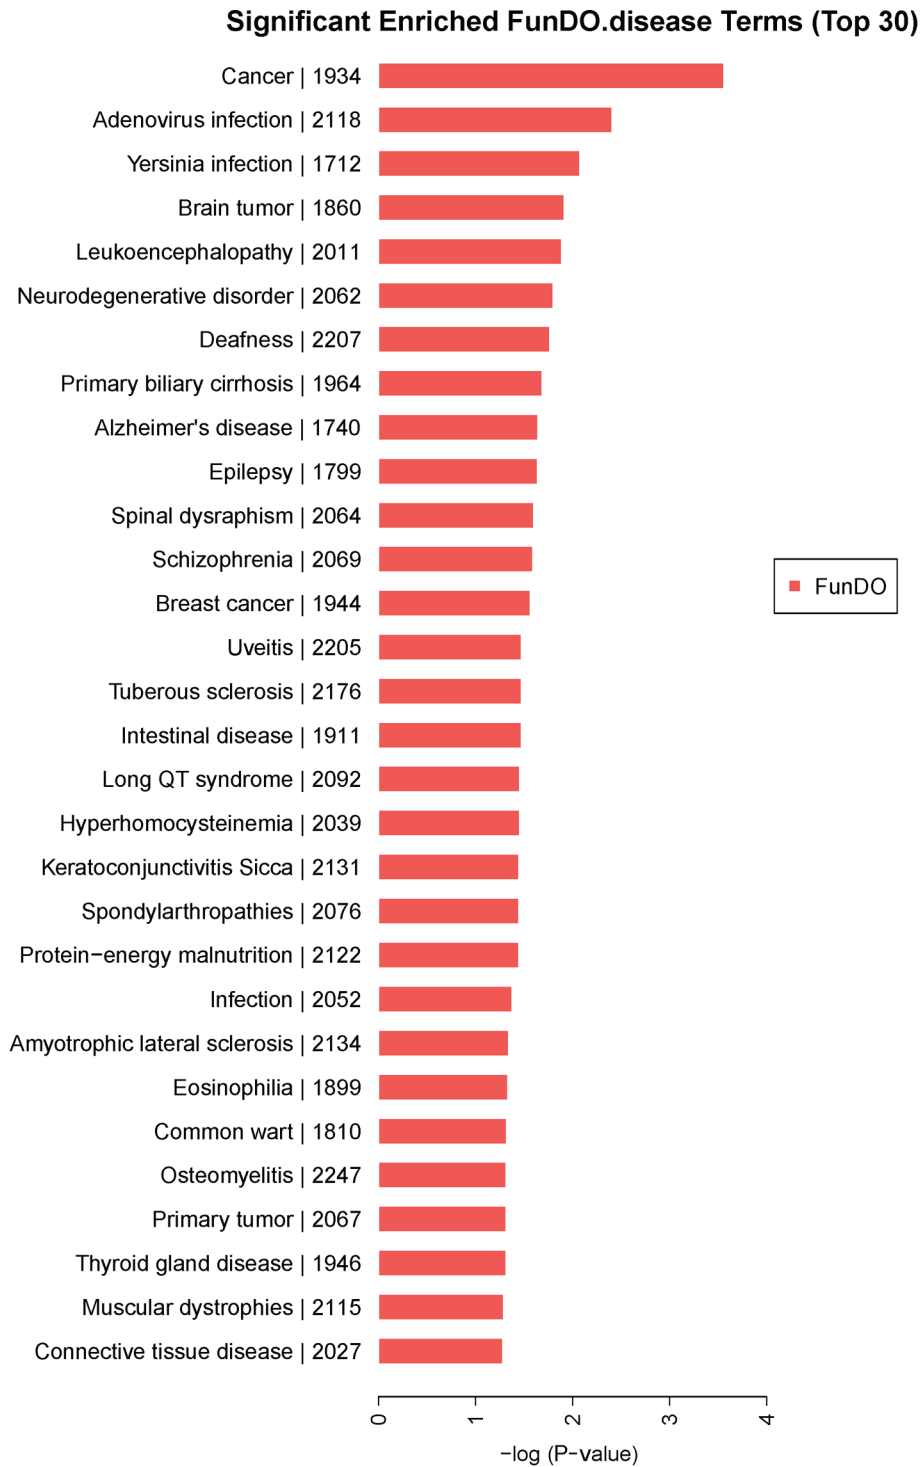

Supplement: Supplementary file 1 [file downloadSupplementary]
